# Supplementary material
Source: publisher figshare collection journal article supplement (https://acs.figshare.com/ndownloader/files/5067244)
Supplement: Supplementary file 1 [file 5067244]

## Supporting Information

### SI 1. Thickness of EDL for BGE with Monovalent Cations

According to Coulomb's law, the electrical force,  $F_e$ , between an oxygen atom in a silanoate ( $\text{SiO}^-$ ) group and the positive counter ion is

$$F_e = \frac{z_S z_B e^2}{4\pi\epsilon_0\epsilon_r x_1^2} \quad (\text{SI-1})$$

where  $z_S$  (-1) and  $z_B$  (+1) are the charge numbers of a silanoate ion and the positive counter ion respectively, and  $e$  is the elementary charge ( $1.602 \times 10^{-12}$  C). The work done on the system in moving a cation toward a silanoate anion a distance  $dx$  from the position  $\infty$  to  $x_1$  is

$$dw = \left( \frac{z_S z_B e^2}{4\pi\epsilon_0\epsilon_r x^2} \right) dx \quad (\text{SI-2})$$

$$w = \int_{\infty}^{x_1} \frac{z_S z_B e^2}{4\pi\epsilon_0\epsilon_r x^2} dx = -\frac{z_S z_B e^2}{4\pi\epsilon_0\epsilon_r x_1} \quad (\text{SI-3})$$

This work  $w$  is the electrostatic contribution to the Gibbs energy of activation,  $\Delta^\ddagger G_{\text{es}}^\circ$ , when two ions form an activated complex. Multiplication by the Avogadro constant  $N_A$  gives the molar quantity,

$$\Delta^\ddagger G_{\text{es}}^\circ = -\frac{N_A z_S z_B e^2}{4\pi\epsilon_0\epsilon_r x_1} \quad (\text{SI-4})$$

The total molar Gibbs energy of activation, or the *standard Gibbs energy of activation*, combining with the non-electrostatic contribution,  $\Delta^\ddagger G_{\text{nes}}^\circ$  is

$$\Delta^\ddagger G^\circ = \Delta^\ddagger G_{\text{nes}}^\circ - \frac{N_A z_S z_B e^2}{4\pi\epsilon_0\epsilon_r x_1} \quad (\text{SI-5})$$

According to the thermodynamic formulation of conventional transition-state theory<sup>18</sup>, the rate constant  $k$  of the reaction is

$$k = (\mathbf{k}T/h) \exp (-\Delta^\ddagger G^\circ/RT) \quad (\text{SI-6})$$

where  $\mathbf{k}$  is Boltzmann constant ( $= R/N_A$ ), and  $h$  is Planck constant. Substitution of  $\Delta^\ddagger G^\circ$  from equation SI-5 into equation SI-6 and taking natural logarithms, we then have

$$\ln k = \ln (\mathbf{k}T/h) - (\Delta^\ddagger G_{\text{nes}}^\circ/RT) + \frac{N_A z_S z_B e^2}{4\pi\epsilon_0\epsilon_r x_1 RT} \quad (\text{SI-7})$$

Equation SI-7 can be written as

$$\ln k = \ln k_0 + \frac{N_A z_S z_B e^2}{4\pi\epsilon_0\epsilon_r x_1 RT} \quad (\text{SI-8})$$

where  $k_0 = \ln (\mathbf{k}T/h) - (\Delta^\ddagger G_{\text{nes}}^\circ/RT)$ ,  $k_0$  is the value of  $k$  in a medium of infinite dielectric constant, in which the electrostatic forces become zero.

Brønsted suggested that the rate of second order reactions 9 or 10 might be expressed as<sup>27</sup>

$$v = k_0 [\text{SiO}^-] [\text{B}] \frac{y_s y_b}{y_x} \quad (\text{SI-9})$$

where  $k_0$  is a constant at a given temperature, B is  $\text{H}^+$  or  $\text{M}^+$ ,  $y_s$  and  $y_b$  are the activity coefficients of silanoate ions and the other reactants,  $y_x$  is the activity coefficient of the product. Square brackets  $[]$  represent the concentrations of species in the liquid phase by convention. According to the extended Debye-Hückel law<sup>28</sup>, the activity coefficient  $y_i$  of an ion may be estimated as

$$\log_{10} y_i = -\frac{Az_i^2 I^{1/2}}{1 + BI^{1/2}} \quad (\text{SI-10})$$

where  $z_i$  is the charge number of an ion  $i$ ,  $A = \frac{F^3}{4\pi N_A \ln 10} \left( \frac{\rho b^\circ}{2\epsilon^3 R^3 T^3} \right)^{1/2}$ ,  $\rho$  is the mass density of the solvent,  $b^\circ = 1 \text{ mol kg}^{-1}$ , and  $B$  is an adjustable empirical parameter. For a very low concentration,  $B = 0$ , then the equation SI-10 can be simplified as

$$\log_{10} y_i = -A z_i^2 I^{1/2} \quad (\text{SI-11})$$

The rate constant of the reaction,  $k$ , is

$$k = k_0 \frac{y_s y_b}{y_x} \quad (\text{SI-12})$$

Taking logarithms on equation SI-12 and replacing  $\log_{10} y_s$ ,  $\log_{10} y_b$ , and  $\log_{10} y_x$  with equation SI-10, we have

$$\ln k = \ln k_0 + 2(\ln 10) z_S z_B A I^{1/2} \quad (\text{SI-13})$$

where  $k_0$  is the rate constant extrapolated to zero ionic strength. Comparing equations SI-12 with SI-8, since  $k$  is the rate constant for the same reaction and  $k_0$  has to be the same, we can solve the thickness of the double layer  $x_1$ ,

$$\delta = x_1 = \frac{1}{F} \sqrt{\frac{\epsilon R T}{2000 I}} \quad (\text{SI-14})$$

## SI 2. Thickness of EDL for BGE with Multivalent Inorganic Cations

The distance between the centers of an oxygen atom in a silanoate ion group and an inorganic cation is  $x_1$ . The distance between the centers of the inorganic cation and an anion is  $x_2$ , and the total distance between the centers of an oxygen atom and an anion is  $x$ , where  $x = x_1 + x_2$ . A simple scheme is shown in Figure SI-1. It is assumed that the ions contact linearly from the capillary wall towards the center. The portion of the surface covered by the cations alone is  $\theta_M$ , and the

portion of the surface covered by silanoate-cation-anion complexes is  $\theta_{MA}$ . Therefore, the average thickness of the electrical double layer  $\delta$  is

$$\delta = \frac{\theta_M x_1 + \theta_{MA} x}{\theta_M + \theta_{MA}} = \frac{\theta_M x_1 + \theta_{MA} (x_1 + x_2)}{\theta_M + \theta_{MA}} \quad (\text{SI-15})$$

where  $\theta_M = K_M a_M^{m+} (1 - \theta_H - \theta_M - \theta_A)$ ,  $\theta_{MA} = K_M a_M^{m+} K_A a_A^{n-} (1 - \theta_H - \theta_M - \theta_A)$ , and  $(\theta_H + \theta_M + \theta_A + \theta_{SiO^-}) = 1$ . When only two ions interact with each other, the distance is  $x_1$ , derived in Section SI-1,

When three ions interact with one another, electric forces are present between an oxygen atom in a silanoate ion and a cation, the cation and an anion, and the anion and the oxygen atom. The total force  $F_e$  is the sum of the three forces that are respectively shown in equation SI-16,

$$F_e = \frac{z_S z_M e^2}{4\pi \epsilon_0 \epsilon_r x_1^2} + \frac{z_M z_A e^2}{4\pi \epsilon_0 \epsilon_r x_2^2} + \frac{z_S z_A e^2}{4\pi \epsilon_0 \epsilon_r (x_1 + x_2)^2} \quad (\text{SI-16})$$

where  $z_S$  representing for the charge of a silanoate ion is (-1),  $z_M$  representing the charge of a multiply charged cation is a positive integer greater than one, and  $z_A$  representing the charge of an anion is a negative integer. The work done on the system in moving the ions toward the silanoate ion a distance  $dx$ ,

$$dw = F_e dx$$

$$w = \int_{\infty}^{x_1} \frac{z_S z_M e^2}{4\pi \epsilon_0 \epsilon_r x_1^2} dx + \int_{\infty}^{x_2} \frac{z_M z_A e^2}{4\pi \epsilon_0 \epsilon_r x_2^2} dx + \int_{\infty}^x \frac{z_S z_A e^2}{4\pi \epsilon_0 \epsilon_r (x_1 + x_2)^2} dx \quad (\text{SI-17})$$

$$w = - \frac{e^2}{4\pi \epsilon_0 \epsilon_r} \left( \frac{z_S z_M}{x_1} + \frac{z_M z_A}{x_2} + \frac{z_S z_A}{x_1 + x_2} \right) \quad (\text{SI-18})$$

Similar to the previous section for the monovalent model, this work  $w$  is the electrostatic contribution to the Gibbs energy of activation,  $\Delta^\ddagger G_{cs}^\circ$ , when three ions form an activated

complex, multiplied by the Avogadro constant  $N_A$  to give the molar quantity. The total molar Gibbs energy of activation, or the *standard Gibbs free energy of activation*, combining with the non-electrostatic contribution,  $\Delta^\ddagger G_{\text{nes}}^\circ$  is

$$\Delta^\ddagger G^\circ = \Delta^\ddagger G_{\text{nes}}^\circ - \frac{N_A e^2}{4\pi\epsilon_0\epsilon_r RT} \left( \frac{z_S z_M}{x_1} + \frac{z_M z_A}{x_2} + \frac{z_S z_A}{x_1 + x_2} \right) \quad (\text{SI-19})$$

Following the same process at that in section SI-1, we have

$$\ln k = \ln k_0 + \frac{N_A e^2}{4\pi\epsilon_0\epsilon_r RT} \left( \frac{z_S z_M}{x_1} + \frac{z_M z_A}{x_2} + \frac{z_S z_A}{x_1 + x_2} \right) \quad (\text{SI-20})$$

For a third order reaction involving three ions, the equation SI-12 can be extended to<sup>18</sup>

$$\log_{10} k = \log_{10} k_0 + 2 (z_S z_M + z_M z_A + z_S z_A) A I^{1/2} \quad (\text{SI-21})$$

Similar to the previous section, since  $z_S = -1$ , we can resolve  $x_2$ ,

$$x_2 = x_1 \sqrt{\frac{z_M}{z_M - 1}} \quad (\text{SI-22})$$

Replacing  $x_1$  and  $x_2$  in equation SI-15 with equations SI-14 and SI-22, the average thickness of the electrical double layer  $\delta$  is

$$\delta = \frac{1}{F} \sqrt{\frac{\epsilon RT}{2000I}} \times \frac{1 + K_A a_{A^{n-}} \left( 1 + \sqrt{\frac{z_M}{z_M - 1}} \right)}{1 + K_A a_{A^{n-}}} \quad (\text{SI-23})$$

### SI 3. Symbols

#### Roman Alphabet

$a_X$  activity of the subscripted specie X in mol L<sup>-1</sup>.

$B$ : Debye- Hückel empirical constant

$e$ : elementary charge,

$E$ : applied electric field per unit length in V/m

$F$ : Faraday constant

$F_e$ : electrical force

$h$ : Planck constant

$I$ : ionic strength

$k$ : Boltzmann constant

$k_0$ : value of the rate constant in a medium of infinite dielectric constant, in which the electrostatic forces become zero.

$K_A$ : equilibrium constants and  $K_A = \frac{[SiO^- M^{m+} A^{n-}]}{[SiO^- M^{m+}] a_{A^{n-}}}$

$K_H$ : equilibrium constants and  $K_H = \frac{[SiOH]}{a_{H^+} [SiO^-]}$

$K_M$ : equilibrium constants and  $K_M^+ = \frac{[SiOM]}{a_{M^+} [SiO^-]}$

$K_M^{m+}$ : equilibrium constants and  $K_M^{m+} = \frac{[SiO^- M^{m+}]}{a_{M^{m+}} [SiO^-]}$

$K_N$ : equilibrium constants and  $K_N = \frac{[SiO^- N]}{[SiO^-] [N]}$

$l_d$ : effective length (from injection end to the detection window)

$l_t$ : total length (from injection end to the detection window)

$N_A$ : Avogadro constant

- $Q_{0,a}$ : number of apparent silanol groups in all forms per unit area at the capillary surface (in  $\text{mol dm}^{-2}$ )
- $R$ : universal gas constant
- $t_0$ : retention time of unretented peak
- $t_{\text{buf}}$ : retention time of eof marker when buffer was used as the background electrolyte
- $t_d$ : electronic delay time
- $t_i$ : retention time of peak  $i$
- $t_{\text{inj}}$ : time consumed per injection of sample
- $t_{\text{rmp}}$ : voltage ramp time
- $t_v$ : time used for voltage application
- $t_{\text{water}}$ : retention time of cof marker when water was used as the background electrolyte
- $T$ : temperature
- $w$ : work done on the system in moving a cation toward a silanoate anion
- $V$ : applied voltage
- $x$ : total distance between the centers of an oxygen atom and an anion is, where  $x = x_1 + x_2$ . It is assumed that the ions contact linearly from the capillary wall towards the center.
- $x_1$ : distance between the centers of an oxygen atom in a silanoate ion group and a cation.
- $x_2$ : distance between the centers of a cation that is attached to an oxygen on the silanoate and the center of an anion in buffer solution
- $\gamma_i$ : activity coefficient of an ion
- $z_A$ : charge of an anion
- $z_B$ : charge number of a positive ion (+1)
- $z_i$ : charge of an ion  $i$
- $z_M$ : charge of a multivalent cation, a positive integer greater than one,

$z_S$  charge number of a silanoate ion (-1)

## Greek Alphabet

$\Delta^\ddagger G^\circ$ : standard Gibbs energy of activation

$\Delta^\ddagger G_{es}^\circ$ : electrostatic contribution to the Gibbs energy of activation

$\Delta^\ddagger G_{nes}^\circ$ : non-electrostatic contribution

$\delta$ : thickness of the electrical double layer in m

$\varepsilon$ : permittivity of the buffer and commonly expressed as  $\varepsilon_0 \varepsilon_r$

$\varepsilon_0$ : permittivity of a vacuum

$\varepsilon_r$ : relative permittivity

$\eta$ : viscosity of the buffer in  $\text{Nm}^{-2}\text{s}$  (or  $\text{Pa}\cdot\text{s}$ )

$\kappa^{-1}$ : Debye length

$\mu_{cp}$ : electrophoretic mobility

$\mu_{eo}$ : electroosmotic mobility

$v_{eo}$ : velocity of the electroosmotic flow

$\theta_A$ : fraction of surface covered by  $A^{n-}$  and  $\theta_A = \frac{K_A a_{A^{n-}}}{1 + K_{M^{m+}} a_{M^{m+}} + K_H a_{H^+} + K_A a_{A^{n-}}}$

$\theta_H$ : fraction of surface covered by  $H^+$  and  $\theta_H = \frac{K_H a_{H^+}}{1 + K_{M^{m+}} a_{M^{m+}} + K_H a_{H^+} + K_A a_{A^{n-}}}$

$\theta_M$ : fraction of surface covered by  $M^{m+}$  and  $\theta_M = \frac{K_{M^{m+}} a_{M^{m+}}}{1 + K_{M^{m+}} a_{M^{m+}} + K_H a_{H^+} + K_A a_{A^{n-}}}$



$\theta_{MA}$ : fraction of the surface covered by silanoate-cation-anion complexes when the charge of

M greater than 1.  $\theta_{MA} = K_M a_M^{m+} K_A a_A^{n-} (1 - \theta_H - \theta_M - \theta_A)$ ,

$\sigma$ : charge per unit surface area or charge density.

$\sigma_v$ : surface charge density due to the applied radial voltage

$\sigma_{Si}$ : surface charge density due to the ionization of the silanol groups

$\xi$ : zeta potential

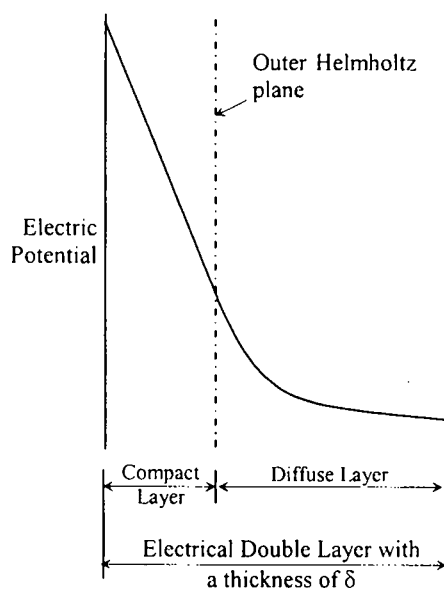

Figure SI-1. A simple electrical double layer model, Gouy-Chapman-Stern model.

In the case that monovalent cations are present,  $\delta = \lambda_D$ . In the case that multivalent inorganic cations are present,  $\delta = \lambda_D$ .  $\lambda_D \neq \lambda_D$ .
